# Supplementary material for: Porous nitrogen-doped carbon nanofibers assembled with nickel nanoparticles for lithium–sulfur batteries
Source: Royal Society of Chemistry journal article supplement (doi:10.1039/c8nr07220e), 2018-11-30
Supplement: c8nr07220e1.pdf [file c8nr07220e1.pdf]

# **Electronic Supplementary Information**

## **Porous Nitrogen-Doped Carbon Nanofibers Assembled with Nickel nanoparticles for Lithium-Sulfur Battery**

Qi Li<sup>a</sup>, Jiangna Guo<sup>a</sup>, Jun Zhao<sup>b</sup>, Cancan Wang<sup>a</sup> and Feng Yan<sup>a,\*</sup>

<sup>a</sup> Jiangsu Key Laboratory of Advanced Functional Polymer Design and Application,  
Department of Polymer Science and Engineering, College of Chemistry, Chemical  
Engineering and Materials Science, Soochow University, Suzhou, 215123, China.

<sup>b</sup> Sichuan College of Architectural Technology, Deyang 618000, China.

E-mail: [fyan@suda.edu.cn](mailto:fyan@suda.edu.cn)

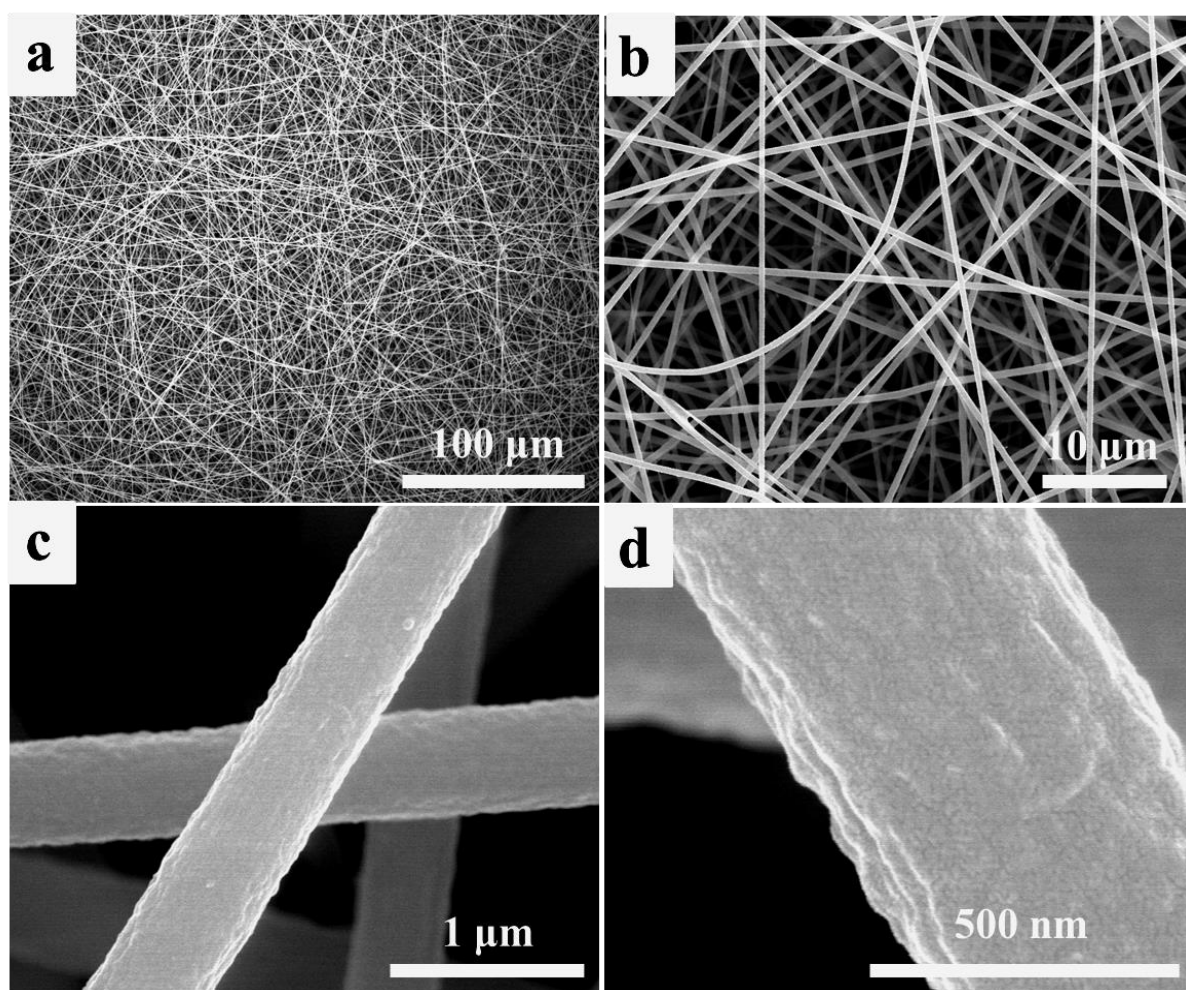

**Figure S1.** SEM images of Ni-precursor film with different scales.

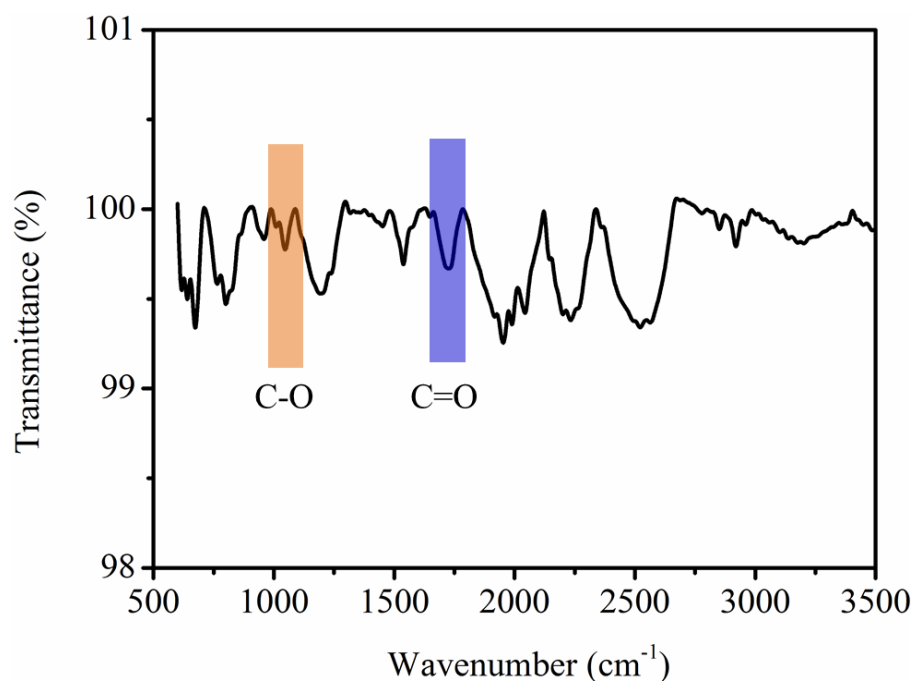

**Figure S2.** FTIR spectrum of Ni/PCNFO.

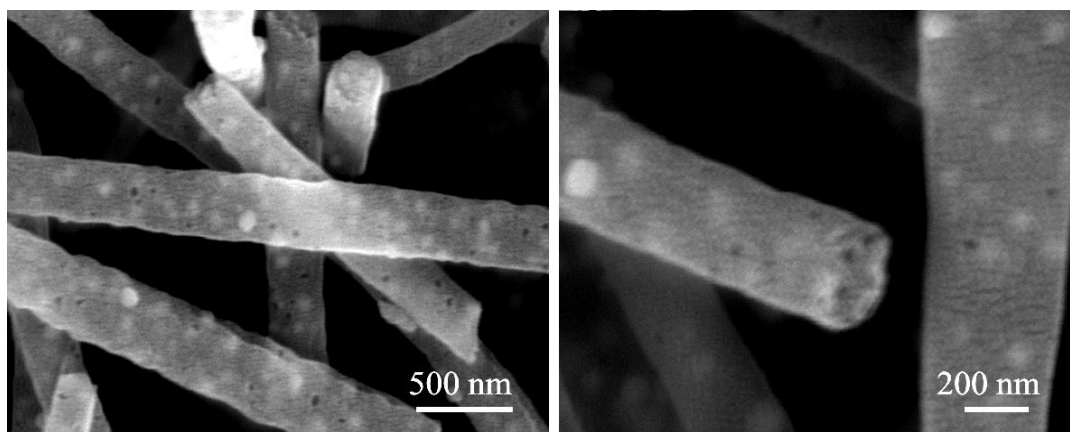

**Figure S3.** Higher magnification SEM images of Ni/PCNFO.

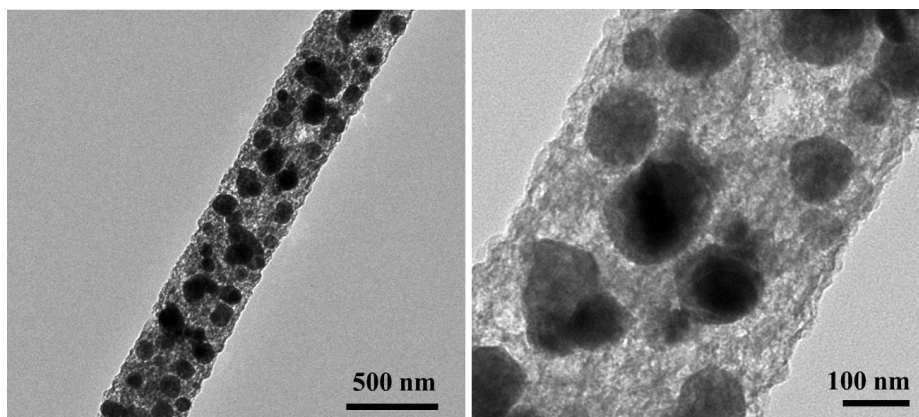

**Figure S4.** TEM images of Ni/PCNF with different scales.

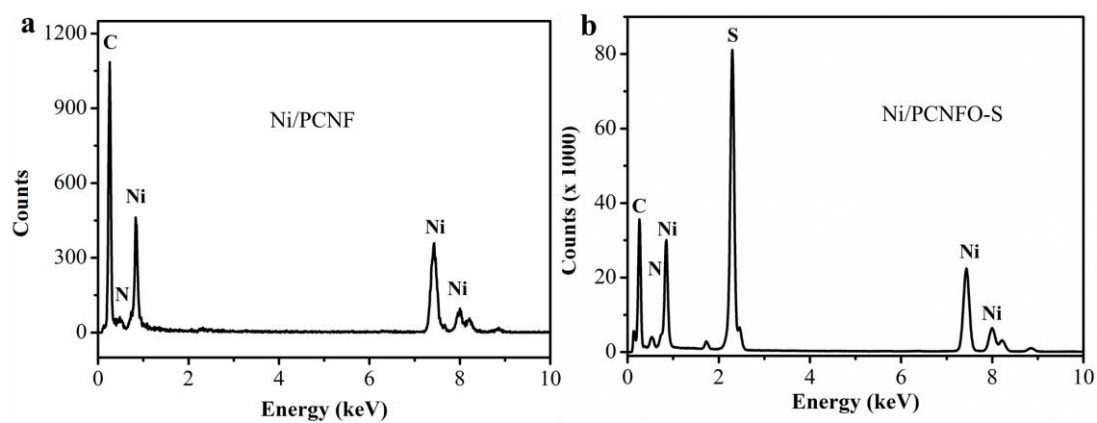

**Figure S5.** The EDS pattern of (a) Ni/PCNF and (b) Ni/PCNFO-S composite.

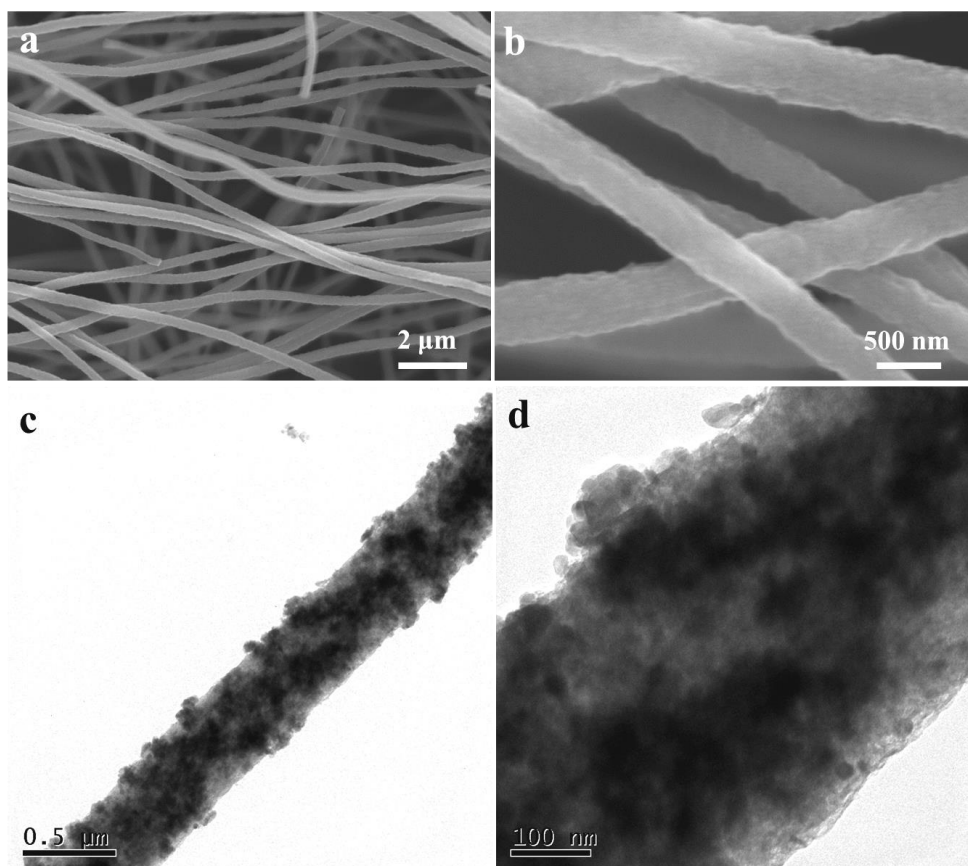

**Figure S6.** SEM images of Ni/PCNFO-S.

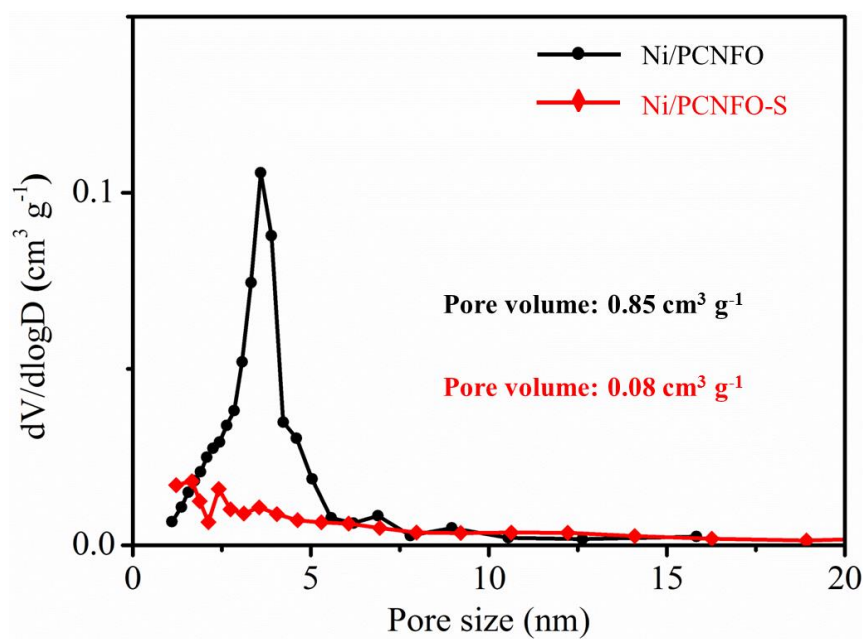

**Figure S7.** Pore size distribution curves of Ni/PCNFO and Ni/PCNFO-S.

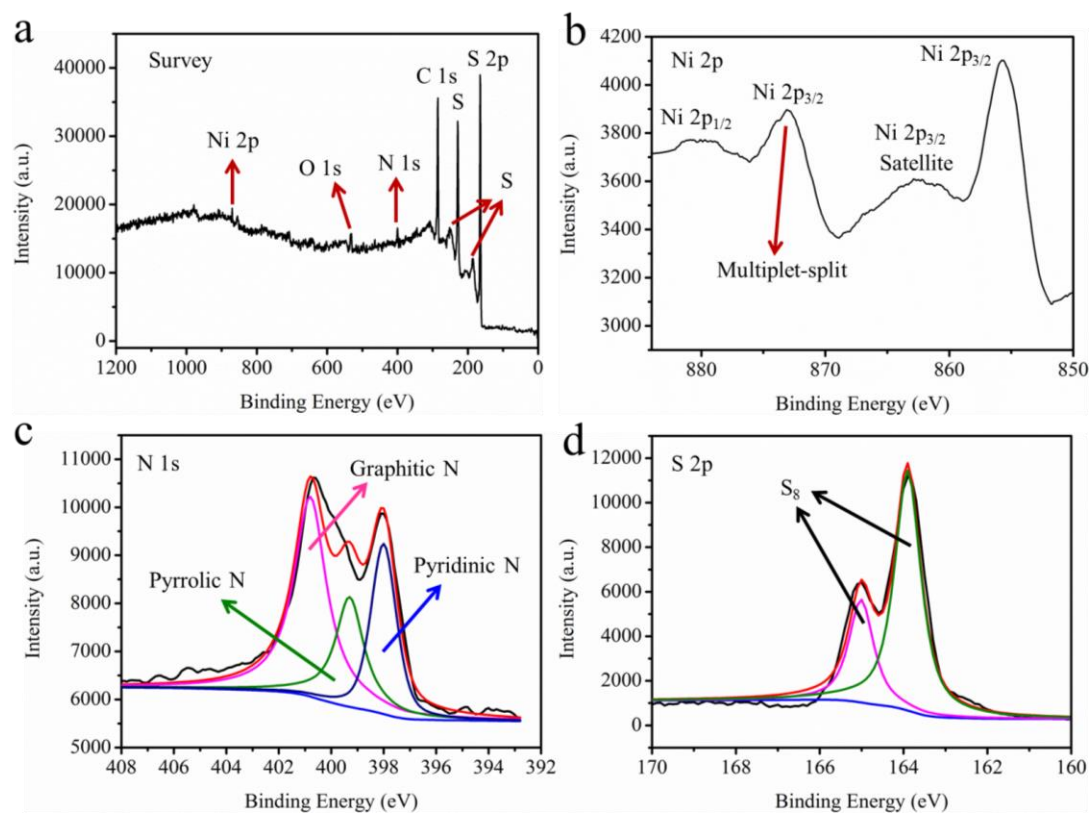

**Figure S8.** (a) Survey XPS spectrum of Ni/PCNFO-S. High-resolution XPS spectrum at Ni 2p, (c) N 1s, and (d) S 2p region of Ni/PCNFO-S.

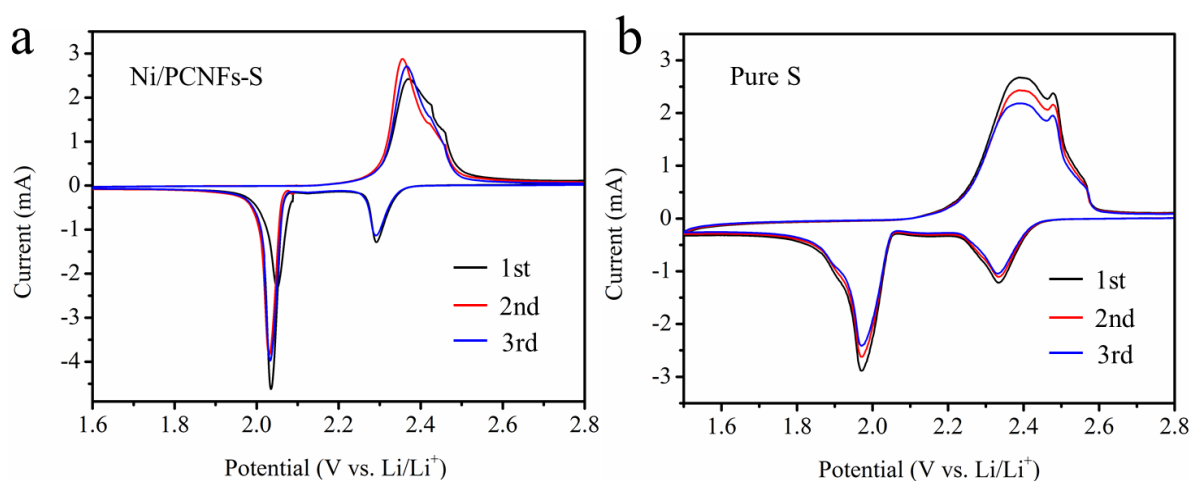

**Figure S9.** CV curves of (a) PCNF-S and (b) pure S cathodes at a scan rate of 0.1 mV s<sup>-1</sup> at the 1st, 2nd, and 3rd cycles between 1.6 and 2.8 V with a sulfur loading of 2.4 mg cm<sup>-2</sup>.

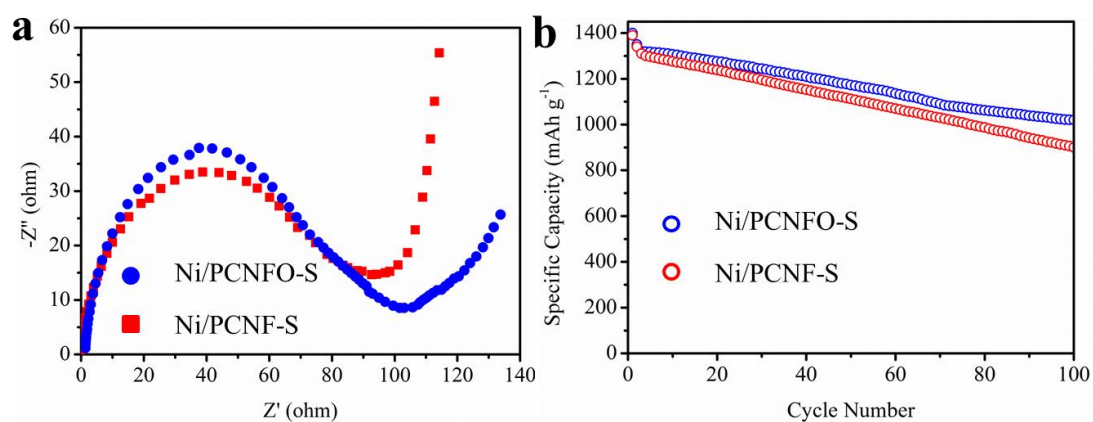

**Figure S10.** (a) EIS spectra and (b) cycling performance of Ni/PCNFO-S and Ni/PCNF-S cathodes with a sulfur areal loading of  $1.8 \text{ mg cm}^{-2}$ , respectively.

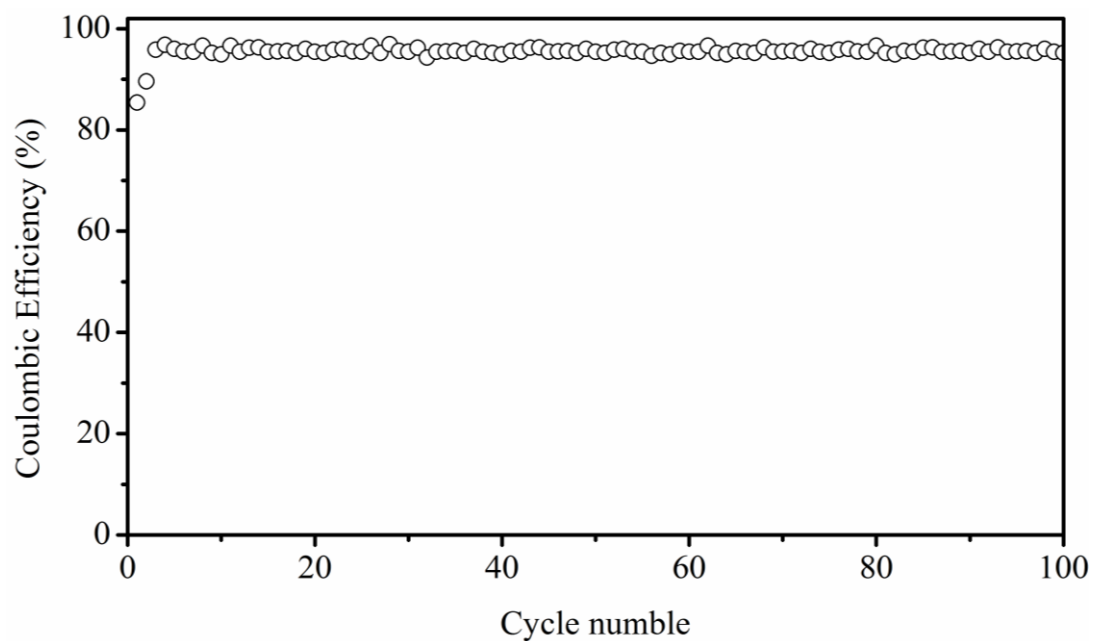

**Figure S11.** Coulombic efficiency of pure S cathode at 0.2 C with the sulfur loading of  $1.8 \text{ mg cm}^{-2}$ .

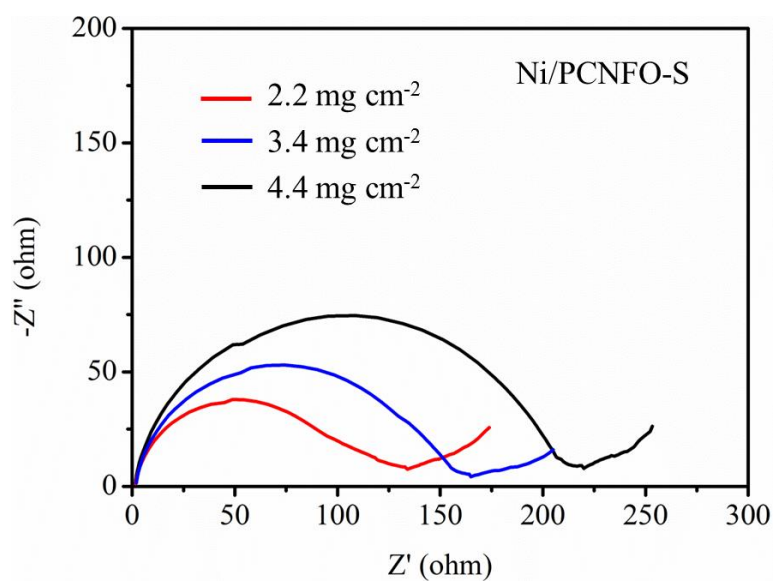

**Figure S12.** EIS spectra of Ni/PCNFO-S cathodes with different areal sulfur loadings.

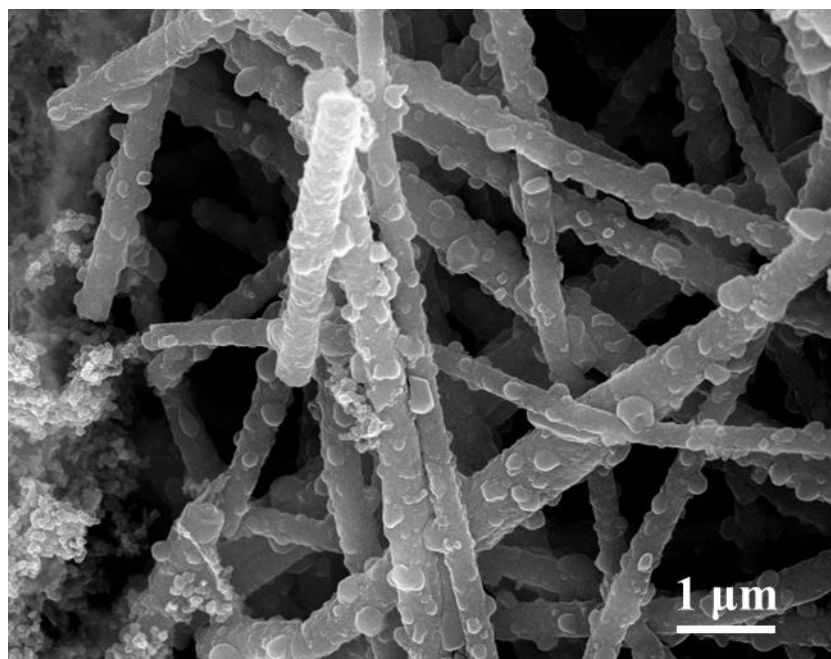

**Figure S13.** SEM image of Ni/PCNFO-S cathode after 500 discharge-charge cycles.

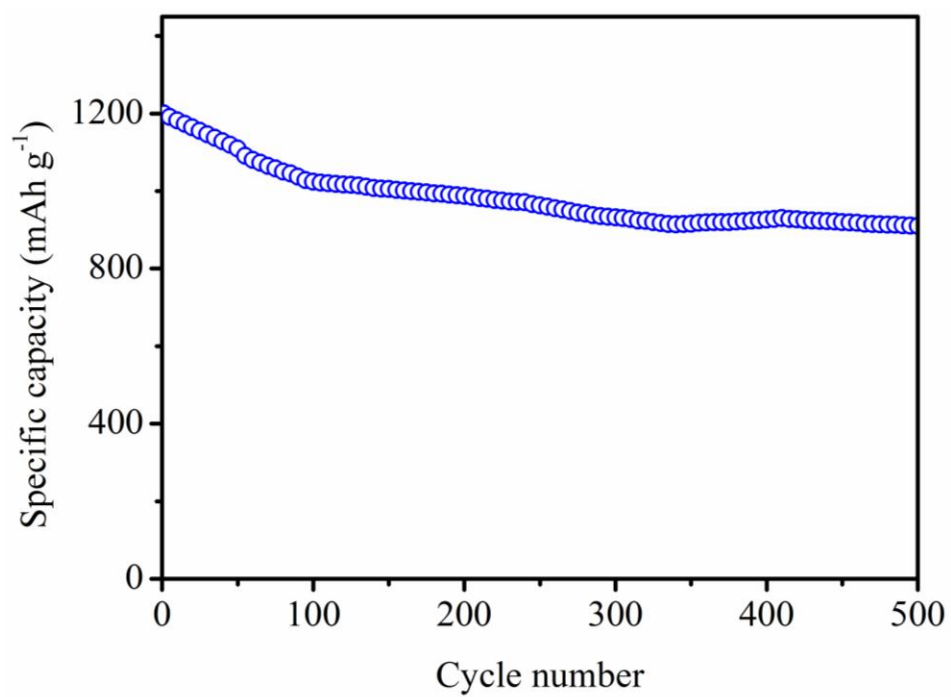

**Figure S14.** Long-term cycling performances of Ni/PCNFO-S cathode under 0.2 C with the sulfur loading of 2.2 mg cm<sup>-2</sup>.

**Table S1.** Electrochemical performances of the representative carbon-based sulfur composite cathodes.

| Sulfur hosts structure                                       | Sulfur content (wt. %) | Sulfur loading ( $\text{mg cm}^{-2}$ ) | Current rate (C) | Initial capacity ( $\text{mAh g}^{-1}$ ) | Cycle number | Capacity Retention ( $\text{mAh g}^{-1}$ ) | Rate capacity ( $\text{mAh g}^{-1} / \text{C}$ ) |
|--------------------------------------------------------------|------------------------|----------------------------------------|------------------|------------------------------------------|--------------|--------------------------------------------|--------------------------------------------------|
| PRC/S                                                        | 66.4                   | 2.0                                    | 0.2              | 923                                      | 500          | 325                                        | 153 /5C                                          |
| PRC/Ni/S <sup>47</sup>                                       | 75.1                   | 2.0                                    | 0.2              | 993                                      | 500          | 813                                        | 573 /5C                                          |
| Highly ordered nitrogen-rich mesoporous carbon <sup>55</sup> | 53.3                   | 0.7-1.0                                | 1.0              | 1209                                     | 200          | 600                                        | 595 /3C                                          |
| Acetylene black <sup>56</sup>                                | 36.0                   | 1.5                                    | 0.1              | 935                                      | 50           | 500                                        | -                                                |
| Carbon black nanoparticles <sup>57</sup>                     | 84.0                   | 2.0                                    | 0.1              | 1250                                     | 100          | 865                                        | 850 /1C                                          |
| Graphitized porous carbon <sup>58</sup>                      | 90.0                   | 0.8-1.0                                | 0.1              | 908                                      | 100          | 739                                        | -                                                |
| Single-wall carbon nanotube network <sup>38</sup>            | 95.0                   | 4.8                                    | -                | 1212                                     | 140          | 842                                        | -                                                |
| Porphyrin-derived graphene-based nanosheets <sup>16</sup>    | -                      | ~ 0.1                                  | 0.2              | 1212                                     | 300          | 798                                        | 988 /2C                                          |
| Graphene oxide-carbon nanotube <sup>59</sup>                 | 75.0                   | 2.3                                    | -                | -                                        | 300          | -                                          | -                                                |
| N,O dual-doped porous carbon microrods <sup>60</sup>         | 79.0-90.0              | -                                      | 0.2              | 1327                                     | 160          | 1071                                       | 558 /4C                                          |
| BCF/S                                                        | 60.0                   | -                                      | 0.2              | 1019                                     | 200          | 447                                        | 188 /5C                                          |
| PCGF/Ni/S <sup>61</sup>                                      | 68.0                   |                                        | 0.2              | 1198                                     | 200          | 1030                                       | 746 /5C                                          |

|                                                                 |      |       |       |       |     |      |         |
|-----------------------------------------------------------------|------|-------|-------|-------|-----|------|---------|
| MOFs-derived<br>N-doped porous<br>carbon/graphene <sup>62</sup> | 64.0 | ~ 2.4 | 0.1   | 1372  | 300 | 608  | 786 /1C |
| Carbon<br>nanofiber <sup>63</sup>                               | 65.0 | 2.6   | <0.05 | >1600 | 70  | 1000 | -       |
| Rice husks<br>derived porous<br>carbon <sup>64</sup>            | 75.0 | 1.6   | 0.1   | 1032  | 50  | 742  | -       |
| Sulfur-nickel<br>foam cathode <sup>65</sup>                     | -    | -     | 0.5   | 1340  | 500 | 493  | 212 /5C |
| Conventional<br>cathode                                         | 60%  | -     | 0.2   | 750   | 50  | 810  | -       |
| 3D sulfur-nickel<br>foam cathode <sup>66</sup>                  | 60.0 | -     | 0.2   | 950   | 50  | 400  | -       |
| This work                                                       | 81.1 | 1.8   | 0.2   | 1320  | 100 | 1070 | 780 /3C |
